# Supplementary material for: Loss of amyloid precursor protein exacerbates early inflammation in Niemann-Pick disease type C
Source: Springer Nature journal article supplement (doi:10.1186/s12974-019-1663-5), 2019-12-01

DAPI

CD3

DAPI + CD3

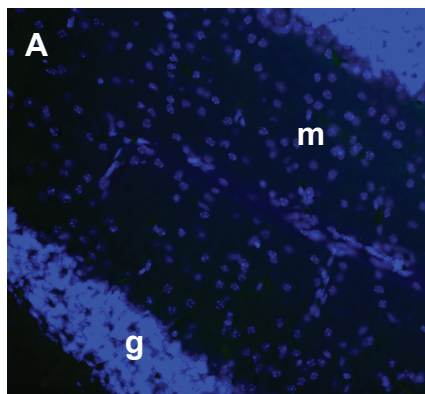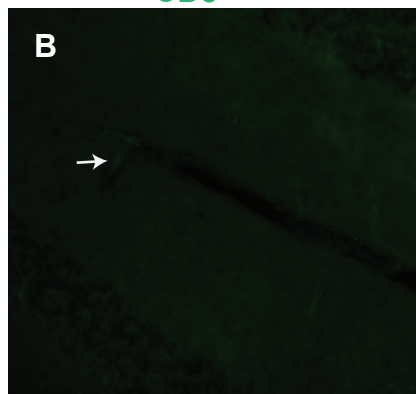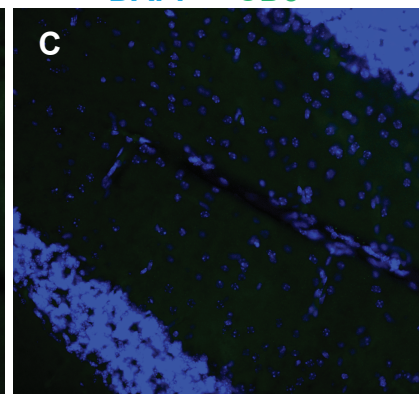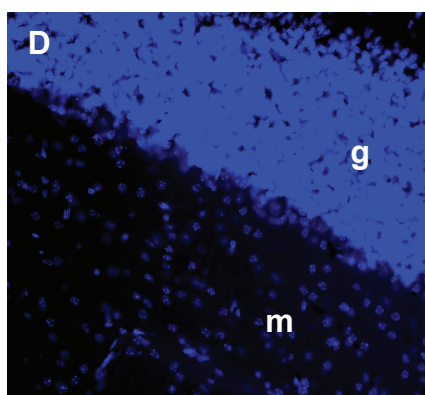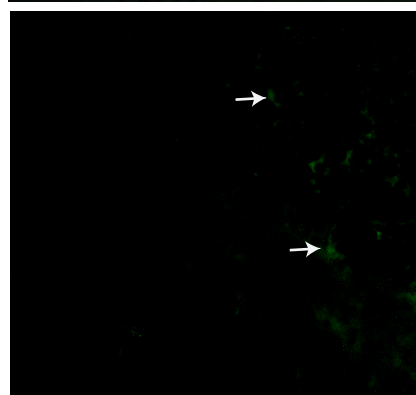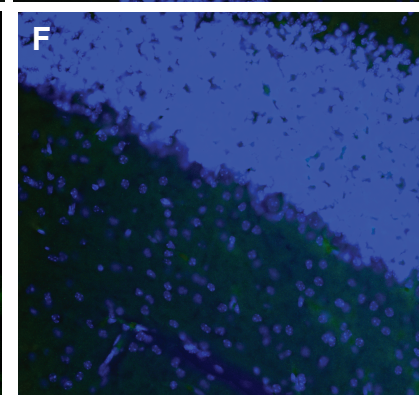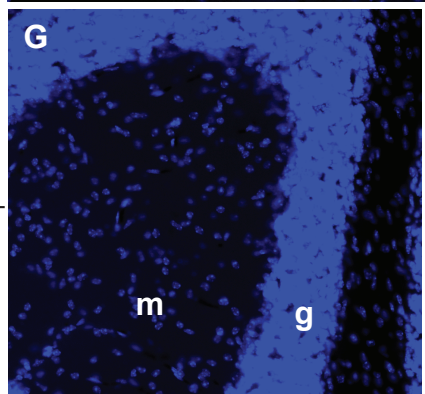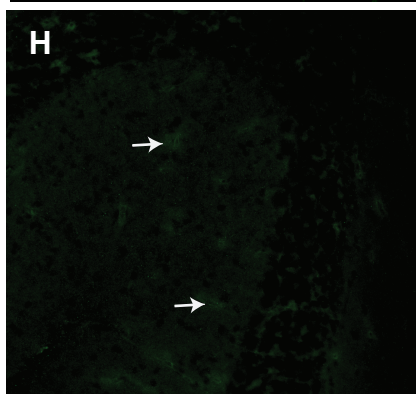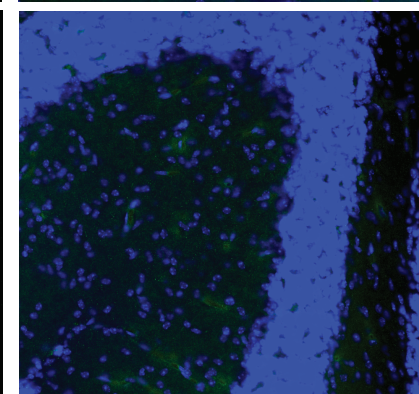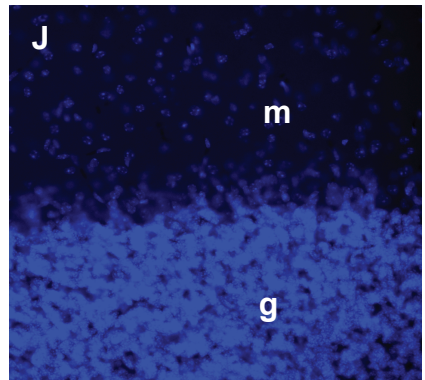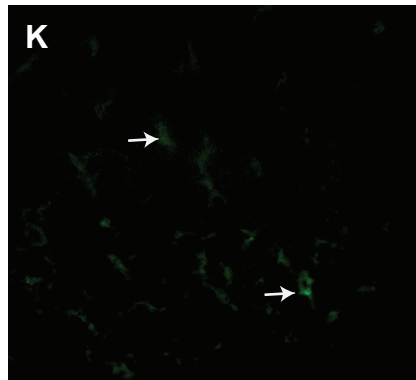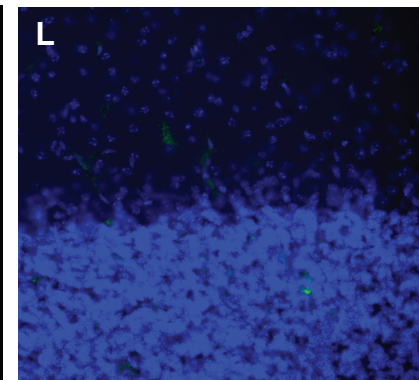

Supplement: MOESM14 [file 17680384]
